# Supplementary material for: Effects of Aromatic Ammoniums on Methyl Ammonium Lead Iodide Hybrid Perovskite Materials
Source: Hindawi journal article supplement (doi:10.1155/2017/1640965), 2017-01-01
Supplement: f1 [file 1640965.f1.docx]

Supporting Information

Effects of aromatic ammoniums on lead halide hybrid perovskite materials

Figure S1: Band gap calculation of perovskite samples.
